# Supplementary material for: Role of surface phenomena in the reaction of molecular solids: the Diels–Alder reaction on pentacene
Source: Royal Society of Chemistry journal article supplement (doi:10.1039/d0ce00269k), 2020-01-01

## Supporting Information

### The Role of Surface Phenomena on the Reaction of Molecular Solids: the Diels-Alder Reaction on Pentacene

Selma Piranej, Michael A. W. Shelhart Sayers, Gregory J. Deye, Sergey N. Maximoff, Jonathan P. Hopwood, Haejun Park, Jean G. Slavsky, Jacob W. Ciszek

Department of Chemistry and Biochemistry, Loyola University Chicago,  
1032 West Sheridan Road, Chicago, Illinois, United States

---

#### Table of Contents

|                                                                                                                                                                                                          |      |
|----------------------------------------------------------------------------------------------------------------------------------------------------------------------------------------------------------|------|
| <b>General Procedures for Solution Phase Kinetic Measurements</b>                                                                                                                                        | ...1 |
| <b>Figure S1.</b> Solution phase kinetic data for <i>N</i> -methylmaleimide, <i>N</i> -ethylmaleimide, and <i>N</i> -propylmaleimide                                                                     | ...2 |
| <b>Figure S2.</b> Calculated IR spectra and carbonyl absorption intensity for <i>N</i> -methylmaleimide, <i>N</i> -ethylmaleimide, <i>N</i> -propylmaleimide, and <i>N</i> - <i>tert</i> -butylmaleimide | ...2 |
| <b>Figure S3.</b> Reaction of pentacene with <i>N</i> - <i>tert</i> -butylmaleimide                                                                                                                      | ...3 |
| <b>Figure S4.</b> Reaction of thin-film tetracene with <i>N</i> -alkylmaleimides                                                                                                                         | ...3 |
| <b>Figure S5.</b> Baselined PM-IRRAS spectra used to generate Figure 4b                                                                                                                                  | ...4 |
| <b>Synthetic Methods</b>                                                                                                                                                                                 | ...5 |
| <b>Spectra of Standard Pentacene -<i>N</i>-ethylmaleimide Adduct</b>                                                                                                                                     |      |
| <sup>1</sup> H NMR                                                                                                                                                                                       | ...6 |
| <sup>13</sup> C NMR                                                                                                                                                                                      | ...7 |
| ATR-IR                                                                                                                                                                                                   | ...8 |

---

#### General Procedures for Solution Phase Kinetic Measurements:

All reactions were performed in N<sub>2</sub> purged chloroform at room temperature (23 °C). Kinetics were measured under pseudo-first-order conditions with the dienophile/adsorbate concentration roughly 100-fold higher than that of pentacene (0.26 mM for pentacene, 44 mM for the enophile/adsorbate). At high concentrations, the dienophile/adsorbates have non-zero absorptions, especially at lower wavelengths, and thus the initial dienophile/adsorbate spectrum is subtracted from those shown in Figure S1. Concentration was monitored via the S<sub>0</sub>-S<sub>1</sub> band at 576 nm.

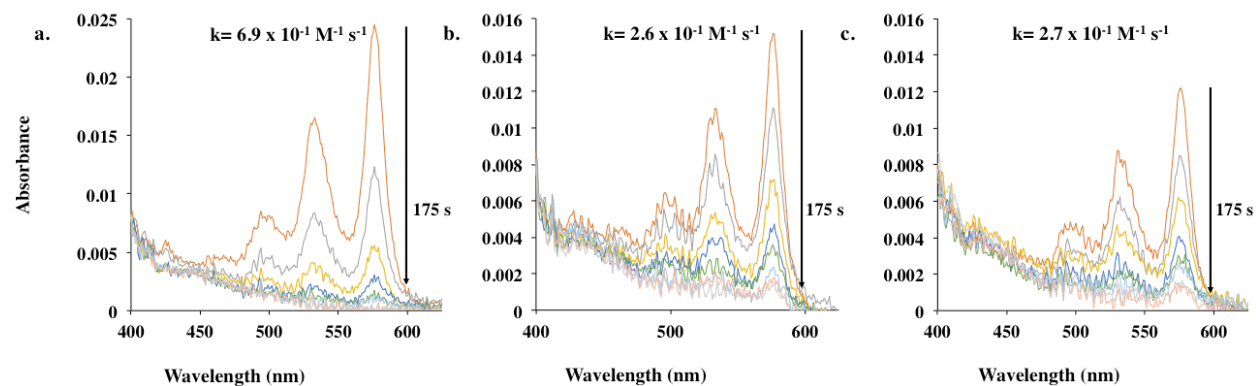

**Figure S1.** Solution phase kinetic data for *N*-methylmaleimide, *N*-ethylmaleimide, and *N*-propylmaleimide. The reaction between pentacene and adsorbate molecules *N*-methylmaleimide, **b)** *N*-ethylmaleimide, **c)** *N*-propylmaleimide at 23 °C. All spectra are after subtraction of the absorbance of the adsorbate/dienophiles.

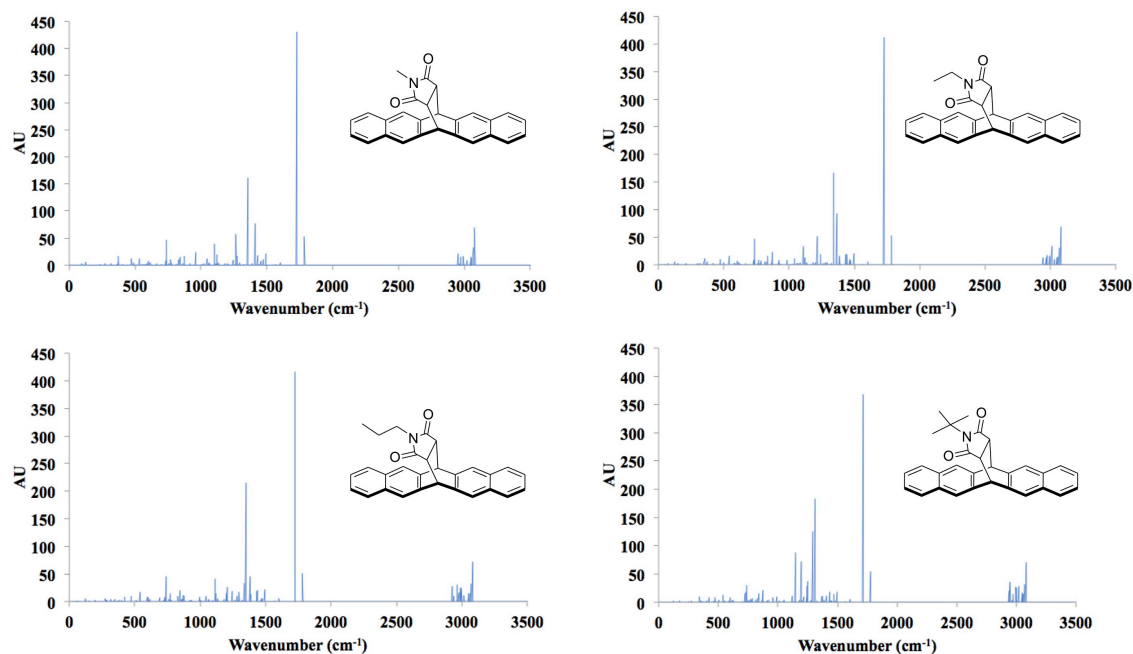

| Adduct                        | Carbonyl Stretching Intensity |
|-------------------------------|-------------------------------|
| <i>N</i> -methylmaleimide     | 411                           |
| <i>N</i> -ethylmaleimide      | 430                           |
| <i>N</i> -propylmaleimide     | 416                           |
| <i>N</i> -tert-butylmaleimide | 368                           |

**Figure S2.** Calculated IR spectra and carbonyl absorption intensity for *N*-methylmaleimide, *N*-ethylmaleimide, *N*-propylmaleimide, and *N*-tert-butylmaleimide. Spectra were calculated with a B3LYP hybrid functional and 6-31G\* basis set. Frequencies have been scaled by the NIST CCCBDB precalculated vibrational scaling factor (0.96)

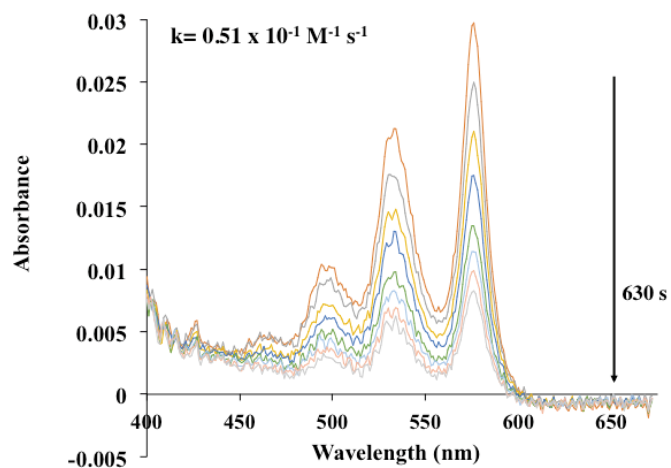

**Figure S3. Reaction of Pentacene with *N*-*tert*-Butylmaleimide.** Solution phase kinetic data for the reaction of pentacene with *N*-propylmaleimide at 23 °C. Spectrum is after subtraction of the absorbance of the adsorbate/dienophiles

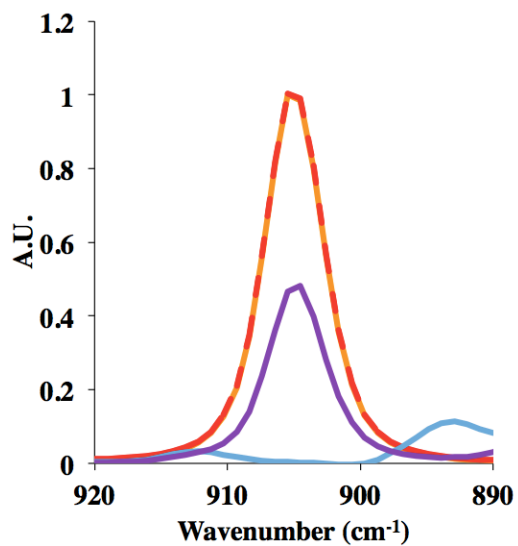

**Figure S4.** Reactions of thin-film tetracene (orange) with *N*-methylmaleimide (red), *N*-ethylmaleimide (blue), *N*-propylmaleimide (purple) showing thin film consumption.

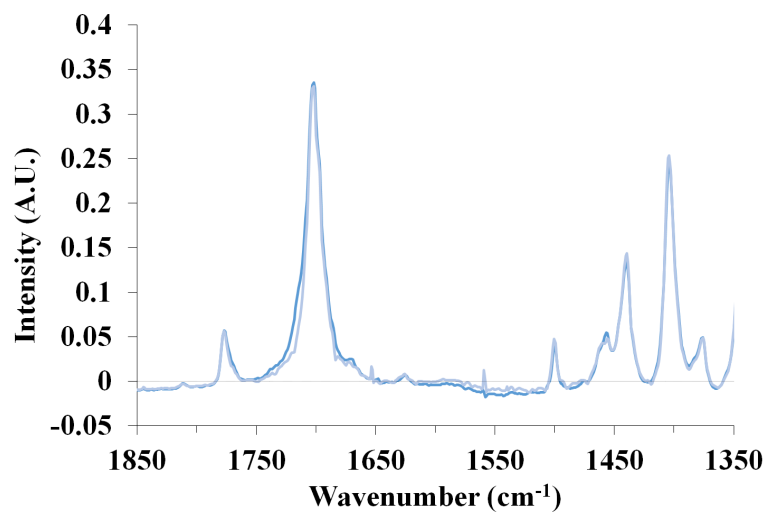

**Figure S5.** PM-IRRAS spectra of *N*-ethylmaleimide reacted with a pentacene thin film used for the subtraction of spectra in Figure 4b. Dark blue line is after 6 h of reaction at 50 °C while the light blue line is the same sample after 30 minutes of exposure to a  $N_2$  purge.

## Synthetic Methods

All materials were purchased from Sigma-Aldrich or TCI and were used without further purification. Reagent grade toluene was purged with nitrogen before use. Pentacene used in reactions was sublimed grade ( $\geq 99.9\%$  pure).  $^1\text{H}$  and  $^{13}\text{C}$  NMR spectra were taken in  $\text{CDCl}_3$  and recorded on a Varian 500 MHz spectrometer. All chemical shifts ( $\delta$ ) are reported in ppm and are referenced to tetramethylsilane. IR spectra were taken using a Shimadzu IRAffinity-1 with a Pike Technologies MIRacle single reflection ATR accessory.

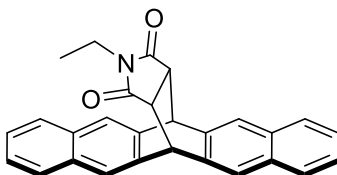

**6,13-dihydro-6,13-ethano-pentacene-16-N-ethylpyrrolidine-15,17-dione:** Pentacene (0.0356 g, 0.128 mmol), *N*-ethylmaleimide (0.0222 g, 0.177 mmol), and toluene (1.4 mL) were placed in a sealed tube and was purged with nitrogen prior to the addition of solvent. Degassed toluene was then added via a syringe and the tube was sealed. The mixture was stirred for 29 h at 120 °C. After completion, the mixture was cooled to 4 °C and the precipitate was collected via vacuum filtration. The grey powder (0.0201 g, 0.0498 mmol) was then recrystallized from toluene to afford the adduct at 39% yield.  $^1\text{H}$  NMR (500 MHz):  $\delta$  7.85 (s, 2H), 7.81 (dd,  $J = 6.1, 3.2$ , 2H), 7.76-7.73 (m, 4H), 7.45 (dd,  $J = 6.3, 3.4$ , 2H), 7.40 (dd,  $J = 6.3, 2.9$ , 2H), 5.02 (s, 2H), 3.33 (t,  $J = 1.7$ , 2H), 3.08 (q,  $J = 7.3$ , 2H), 0.09 (t,  $J = 7.3$ , 3H).  $^{13}\text{C}$  NMR (125 MHz):  $\delta$  176.51, 138.25, 135.43, 132.39, 132.37, 127.52, 127.46, 125.95, 125.83, 123.53, 122.66, 46.63, 45.45, 33.14, 11.63. IR ( $\text{cm}^{-1}$ ) 3055, 2961, 1776, 1697, 1609, 1499, 1439, 1402, 1339, 1225, 1130, 999, 895, 849, 752.

STANDARD PROTON PARAMETERS  
Pulse Sequence: szpu1

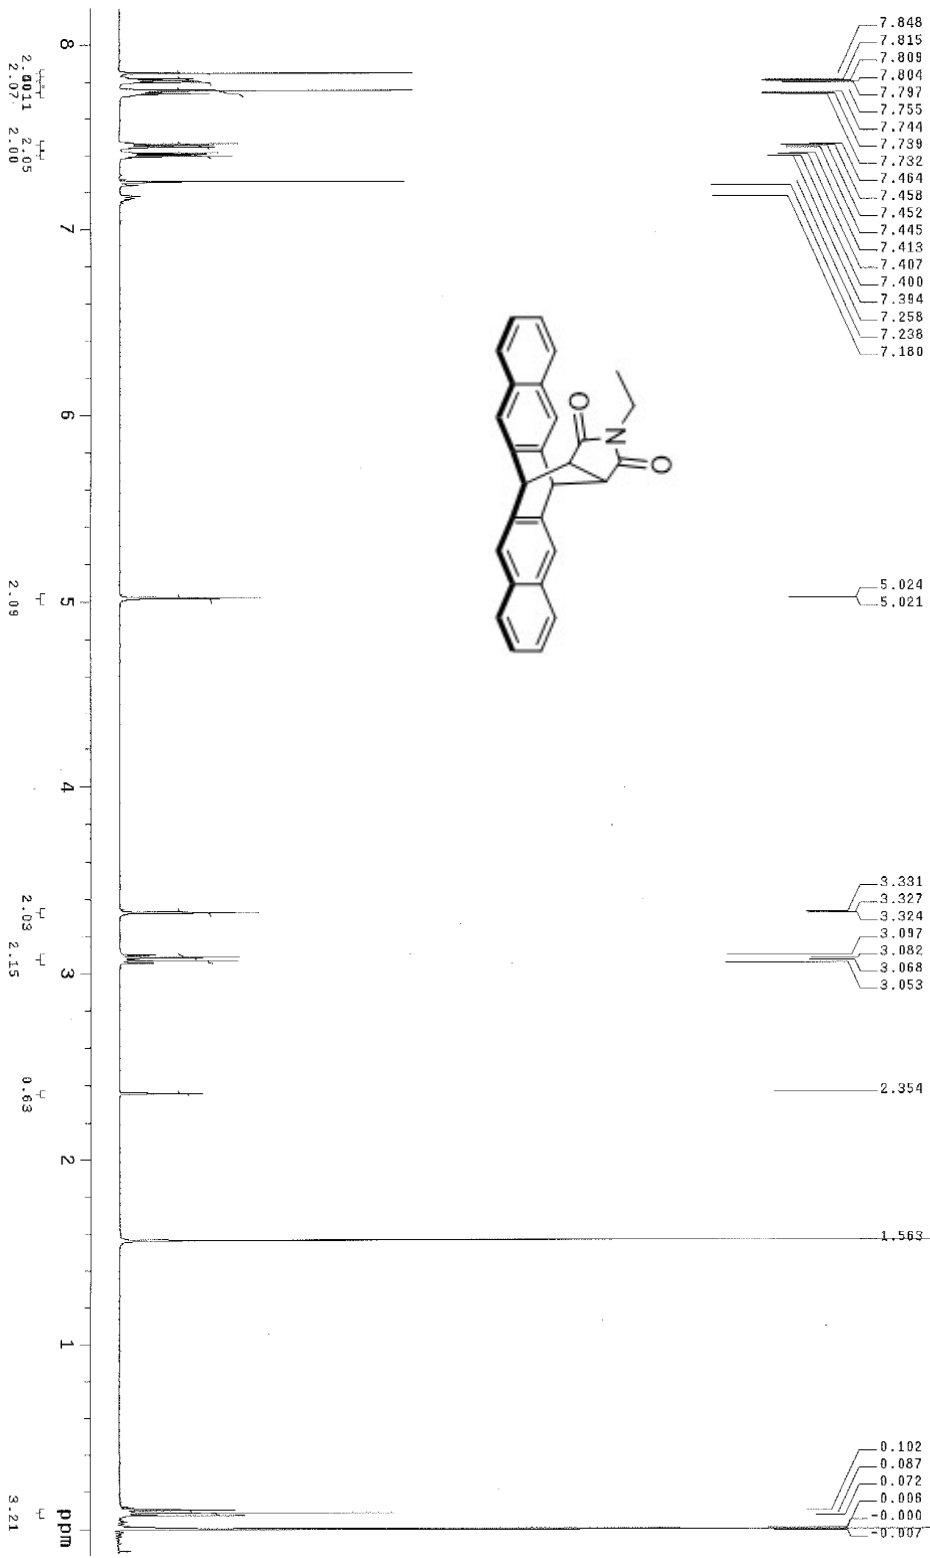

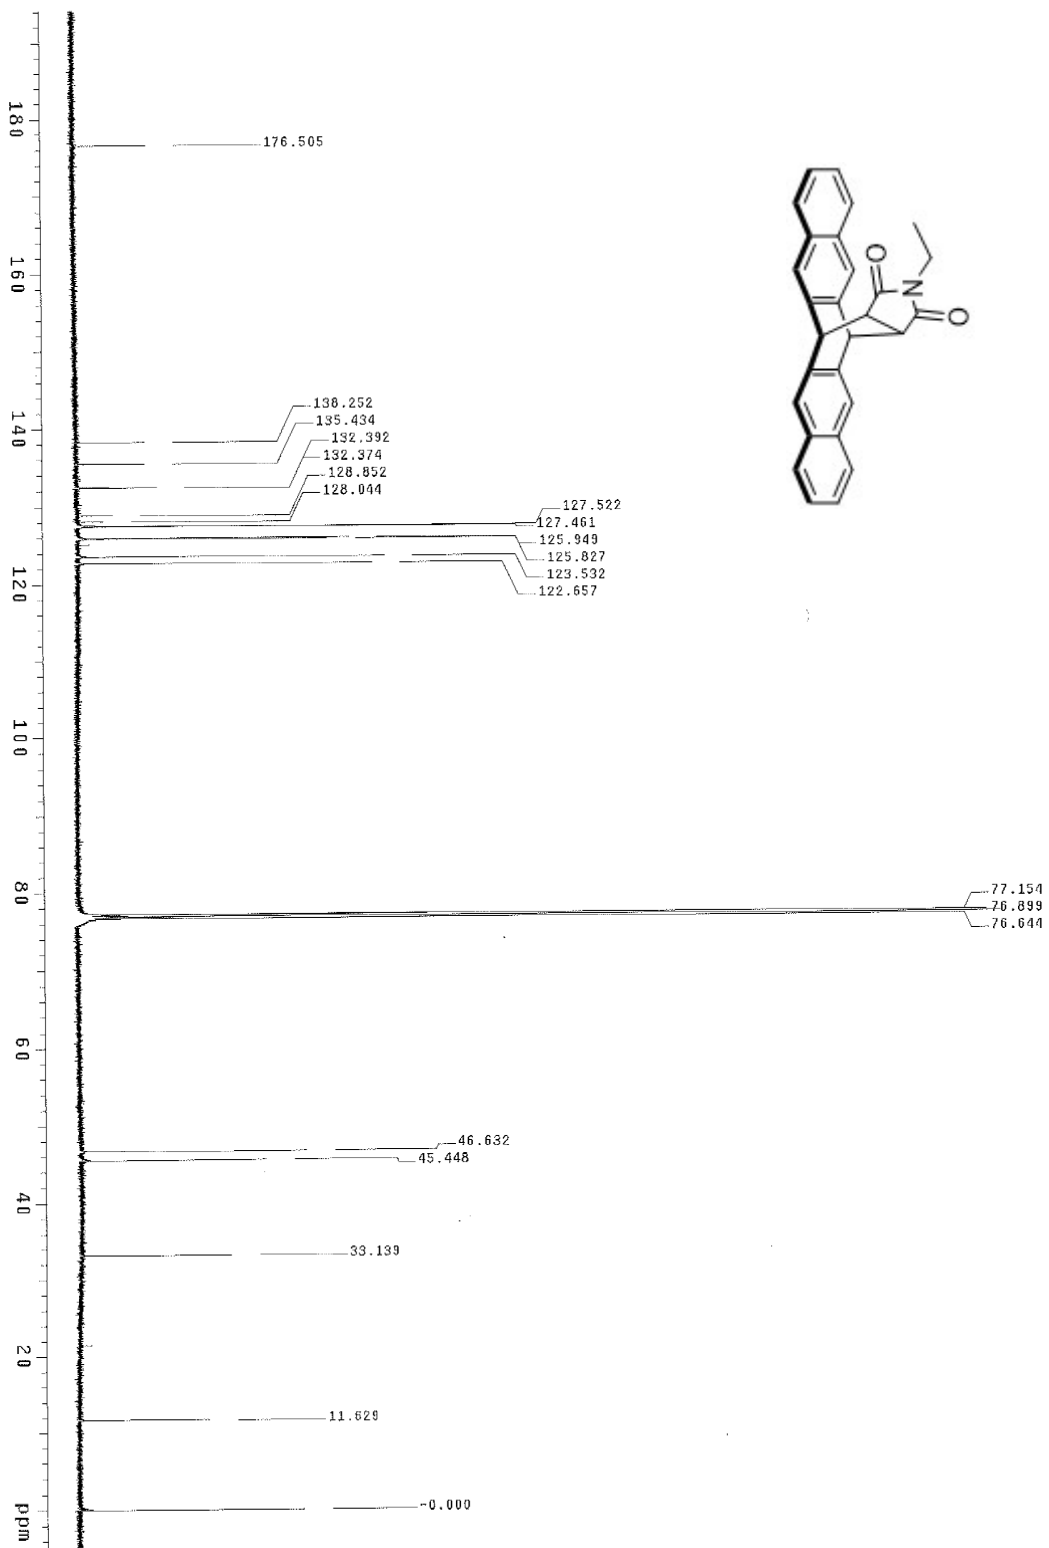

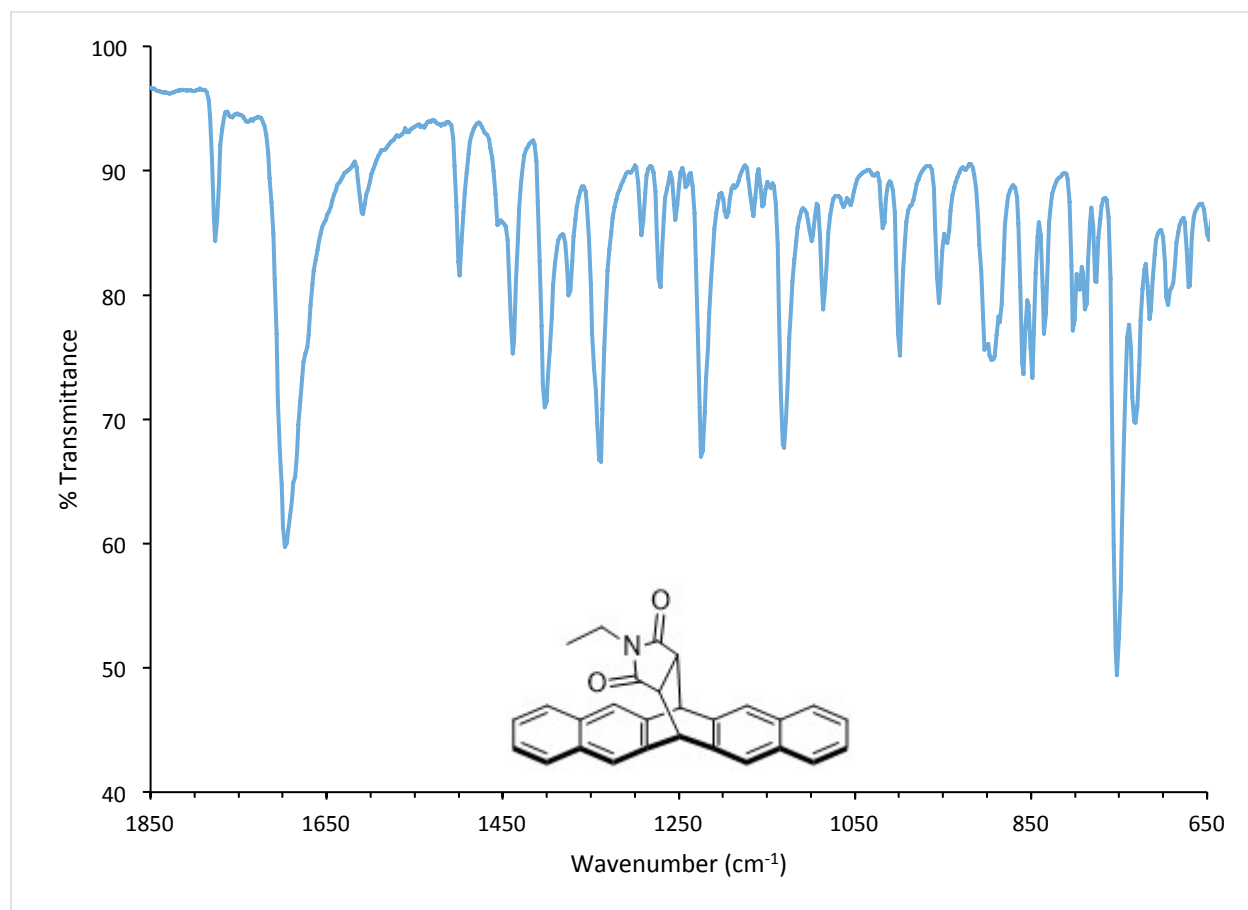

Supplement: d0ce00269k1.pdf [file d0ce00269k1.pdf]
